# Supplementary material
Source: Springer Nature journal article supplement (https://www.springermedizin.de/resource/supplementary/12985_2013_2365_MOESM5_ESM.pdf/9606916)

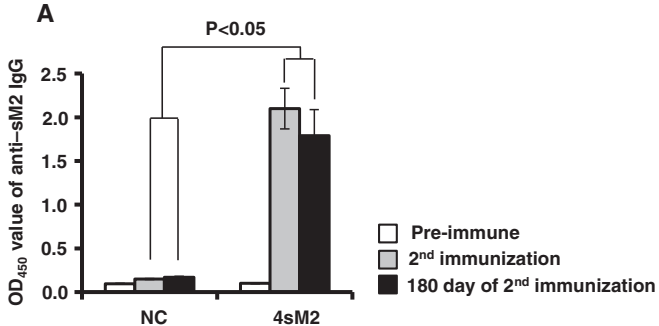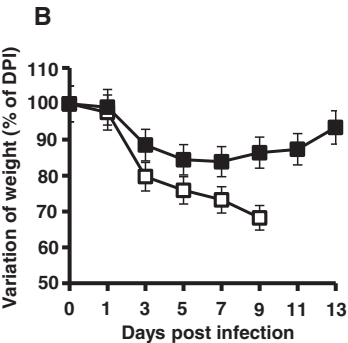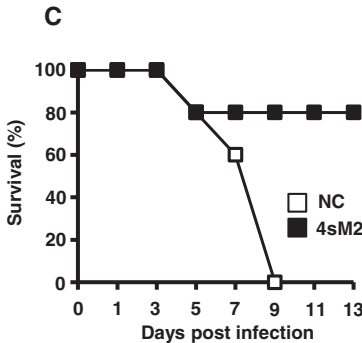

Supplement: MOESM5 [file 9606916]
